# Supplementary material for: CD14 Expressing Precursors Give Rise to Highly Functional Conventional Dendritic Cells for Use as Dendritic Cell Vaccine
Source: MDPI journal article supplement (doi:10.3390/cancers13153818), 2021-07-29
Supplement: s1 [file s1]

# Supplementary Figure S1

|            |                                                     |            |                                                             |
|------------|-----------------------------------------------------|------------|-------------------------------------------------------------|
| cl 0       |                                                     | cl 5       |                                                             |
| GO:0016071 | mRNA metabolic process                              | GO:0006614 | SRP-dependent cotranslational protein targeting to membrane |
| GO:0044265 | cellular macromolecule catabolic process            | GO:0006613 | cotranslational protein targeting to membrane               |
| GO:0008380 | RNA splicing                                        | GO:0000184 | nuclear-transcribed mRNA catabolic process, nonsense-       |
| GO:0006397 | mRNA processing                                     | GO:0045047 | protein targeting to ER                                     |
| GO:0034822 | cellular protein-containing complex assembly        | GO:0019080 | viral gene expression                                       |
| cl 1       |                                                     | cl 6       |                                                             |
| GO:0000278 | mitotic cell cycle                                  | GO:0002274 | myeloid leukocyte activation                                |
| GO:0140014 | mitotic nuclear division                            | GO:0001775 | cell activation                                             |
| GO:1903047 | mitotic cell cycle process                          | GO:0002252 | immune effector process                                     |
| GO:0007049 | cell cycle                                          | GO:0002444 | myeloid leukocyte mediated immunity                         |
| GO:0000280 | nuclear division                                    | GO:0043299 | leukocyte degranulation                                     |
| cl 2       |                                                     | cl 7       |                                                             |
| GO:0002444 | myeloid leukocyte mediated immunity                 | GO:0006413 | translational initiation                                    |
| GO:0002274 | myeloid leukocyte activation                        | GO:0006414 | translational elongation                                    |
| GO:0016050 | vesicle organization                                | GO:0006412 | translation                                                 |
| GO:0043299 | leukocyte degranulation                             | GO:0043043 | peptide biosynthetic process                                |
| GO:0002275 | myeloid cell activation involved in immune response | GO:0000184 | nuclear-transcribed mRNA catabolic process, nonsense-       |
| cl 3       |                                                     | cl 8       |                                                             |
| GO:0001775 | cell activation                                     | GO:0042254 | ribosome biogenesis                                         |
| GO:0002274 | myeloid leukocyte activation                        | GO:0006364 | rRNA processing                                             |
| GO:0043299 | leukocyte degranulation                             | GO:0016072 | rRNA metabolic process                                      |
| GO:0045321 | leukocyte activation                                | GO:0022613 | ribonucleoprotein complex biogenesis                        |
| GO:0002444 | myeloid leukocyte mediated immunity                 | GO:0034660 | ncRNA metabolic process                                     |
| cl 4       |                                                     |            |                                                             |
| GO:0016032 | viral process                                       |            |                                                             |
| GO:0044403 | symbiotic process                                   |            |                                                             |
| GO:0044419 | interspecies interaction between organisms          |            |                                                             |
| GO:0002252 | immune effector process                             |            |                                                             |
| GO:0016050 | vesicle organization                                |            |                                                             |

**Supplementary Figure S1.** Top 5 Gene ontology terms obtained from the differentially expressed genes (DEGs) of the clusters obtained from single cell RNA sequence data. The GO terms of candidate DEGs were analyzed using ToppGene.

Supplementary Figure S2

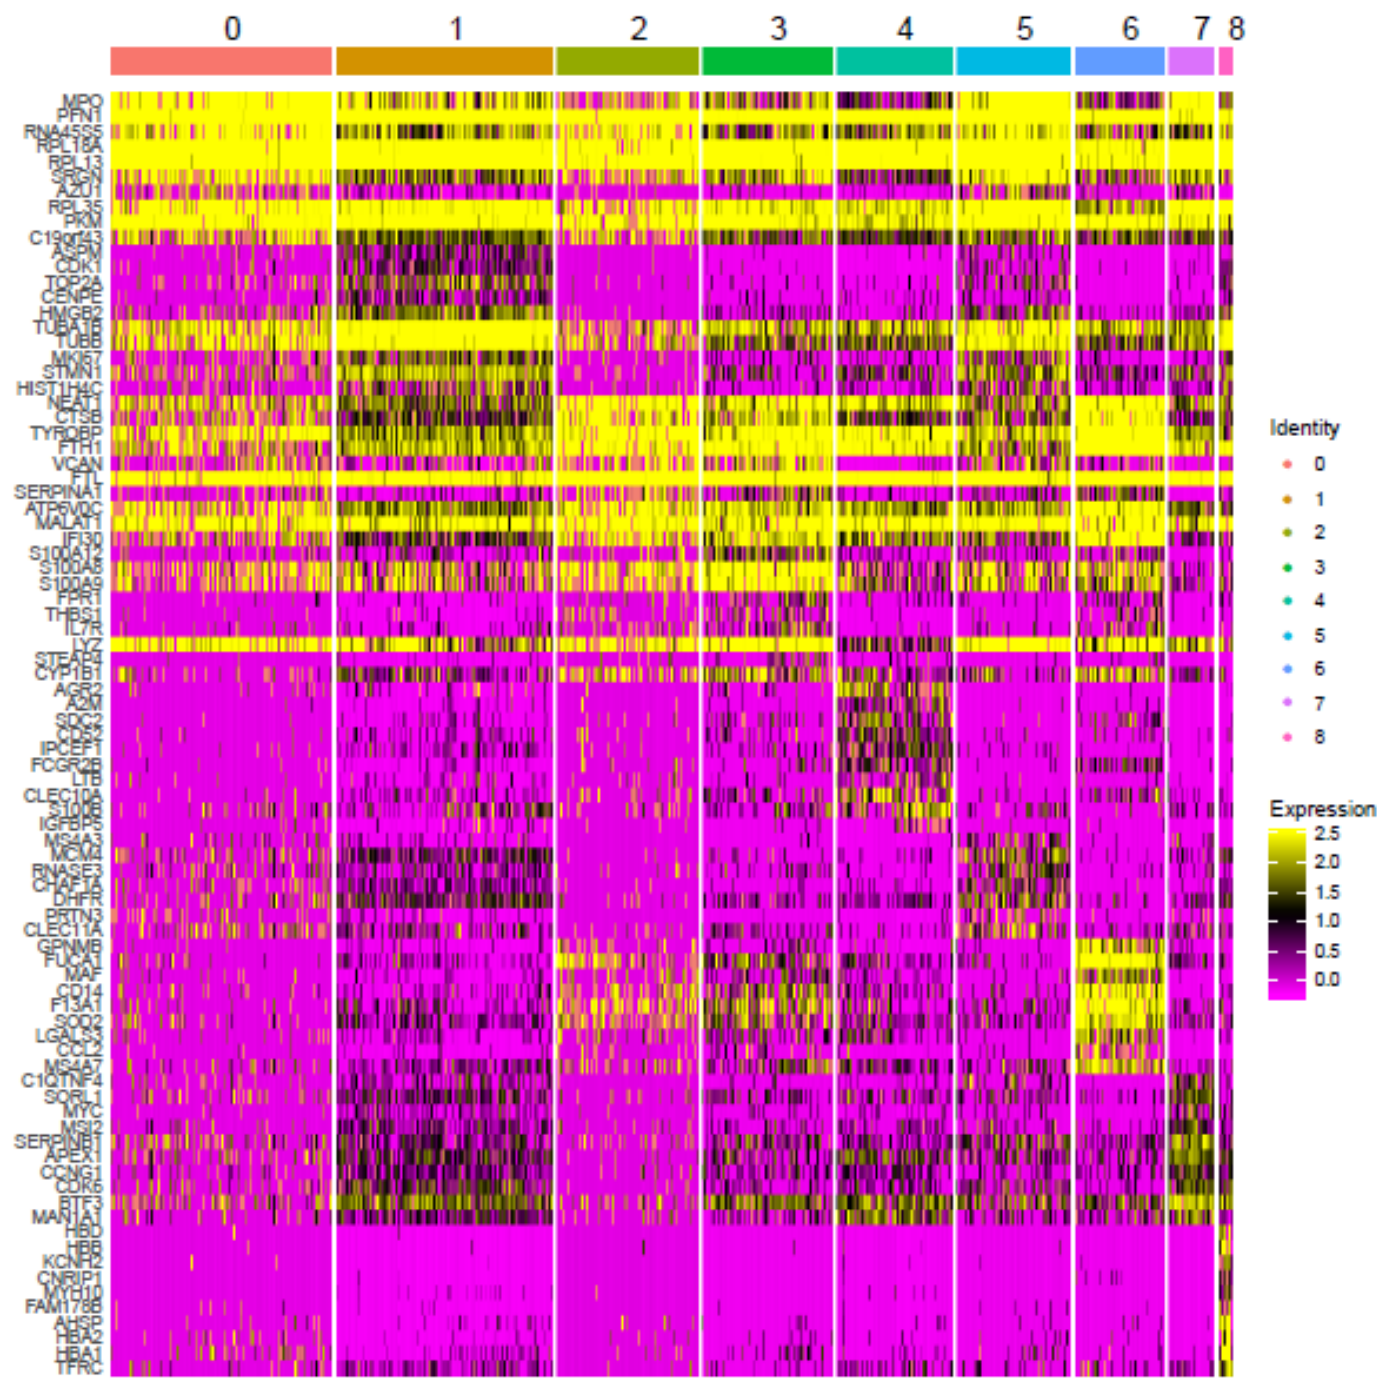

**Supplementary Figure S2.** Heatmap of the top 10 differentially expressed genes (DEGs) of the clusters obtained from single cell RNA sequence data.

## Supplementary Figure S3

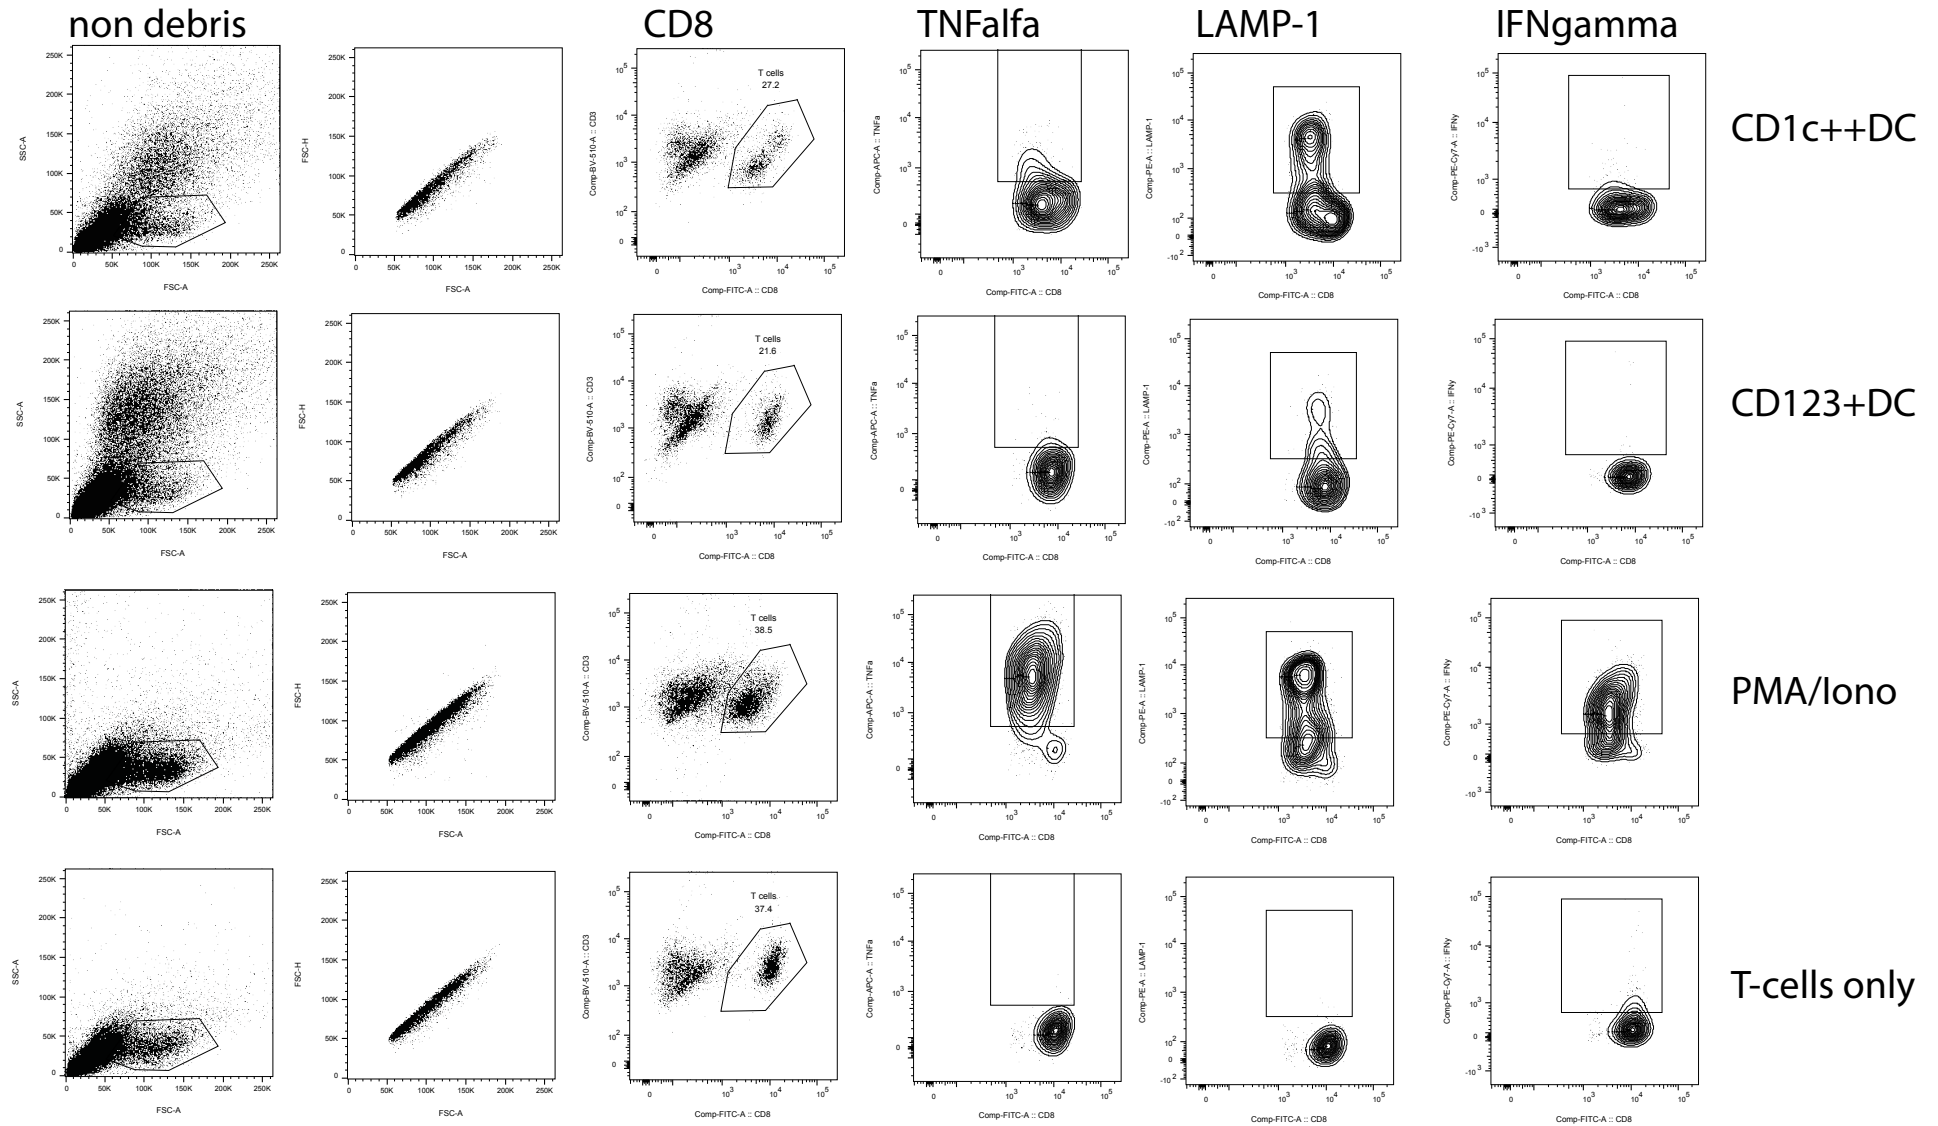

**Supplementary Figure S3.** Gating strategy for WT1-specific T-cell assay. One experiment is shown out of 5. Live lymphocytes are gated followed by CD8 and accordingly TNFalfa, LAMP-1 or IFNgamma.
